# Supplementary material
Source: PubMed Central journal article supplement (PMC4564006)
Supplement: NIHMS715542-supplement-1.pdf [file NIHMS715542-supplement-1.pdf]

SUPPLEMENTAL MATERIAL

**Mediterranean and DASH diet scores and mortality in women with heart failure: the Women's Health Initiative**

Emily B. Levitan, ScD; Cora E. Lewis, MD, MSPH; Lesley F. Tinker, PhD; Charles B. Eaton, MD, MS; Ali Ahmed, MD, MPH; JoAnn E. Manson, MD, DrPH; Linda G. Snetselaar, RD, PhD; Lisa W. Martin, MD; Maurizio Trevisan, MD, MS; Barbara V. Howard, PhD; James M. Shikany, DrPH

University of Alabama at Birmingham, Birmingham, AL (EBL, CEL, AA, JMS), Birmingham VA Medical Center, Birmingham, AL (AA), Fred Hutchinson Cancer Research Center, Seattle, WA (LFT), Brown University, Providence, RI (CBE), Brigham and Women's Hospital, Harvard Medical School, Boston, MA (JEM), University of Iowa, Iowa City, IA (LGS), George Washington University, Washington, DC (LWM), City College of New York, New York, NY (MT), MedStar Health Research Institute, Hyattsville, MD and Georgetown/Howard Universities Center for Clinical and Translational Sciences, Washington, DC (BVH)

## Supplemental Methods

The modified Block food-frequency questionnaire (FFQ) contained 122 questions about frequency of consumption of foods and beverages over the previous 3 months, 19 adjustment items primarily related to fat intake, and 4 summary questions.<sup>1</sup> The frequency questions included predefined responses that ranged from “never or less than once per month” to “2+ times per day” for foods and “6+ times per day” for beverages. Small, medium, or large portion sizes were assessed as compared to specified medium size portions. Pictures were provided to help with portion size estimation.

Nutrient intake was calculated by multiplying the frequency of consumption of each item reported on the food-frequency questionnaire (FFQ) by the nutrient content for the specified portion size and summing over items and was adjusted for energy using the residuals method.<sup>2</sup> Total energy intake was calculated using calibration equations based on energy intake determined using doubly-labeled water.<sup>3</sup> The food groups fruits, vegetables, legumes, nuts, whole grains, fish, and red and processed meats were created using the MyPyramid Equivalents Database to include contributions from mixed dishes.<sup>4</sup> The food groups low-fat dairy and sweetened beverages, which are not defined in the MyPyramid Equivalents Database, were created from the FFQ line items. Milk drinking was assessed as frequency and usual type of milk. Milk servings counted toward the low-fat dairy group if the usual type was 2% milk, 1% milk or butter milk, or non-fat or skim milk. The line items low fat cottage cheese, non-fat cheeses, part-skim or reduced fat cheeses, and non-fat yogurt also counted towards the low-fat dairy group. The line items Tang, Kool-Aid, other fruit drinks and regular soft drinks (not diet) counted towards the sweetened beverages group.

For the Mediterranean diet score, we ranked participants on intake of 1. fruits, 2. vegetables, 3. nuts, 4. legumes, 5. whole grains, 6. fish, 7. ratio of monounsaturated to saturated fat, 8. red and processed meats, and 9. alcohol, as previously described.<sup>5</sup> Participants whose intake was above the median for fruits, vegetables, nuts, legumes, whole grains, fish, or ratio of monounsaturated to saturated fat received one point for each category. Consumption of red and processed meat below the median was awarded 1 point, and alcohol intake between 5 and 15 g/d was awarded 1 point. The total score could range from 0 to 9.

For the DASH diet score, we ranked participants on intake of 1. fruits, 2. vegetables, 3. nuts and legumes, 4. low-fat dairy, 5. whole grains, 6. sodium, 7. sweetened beverages, and 8. red and processed meats, as previously described.<sup>6</sup> For fruits, vegetables, nuts and legumes, low-fat dairy, and whole grains, participants in the highest quintile received a score of 5, those in the second highest quintile received a score of 4, and so on. For sodium, sweetened beverages, red and processed meats, the scoring was reversed with participants in the highest quintile receiving a score of 1 and participants in the lowest quintile receiving a score of 5. The score for each component was summed to get the overall score which could range from 8 to 40.

Supplemental Table 1. Characteristics of Women's Health Initiative participants with heart failure hospitalization by whether they were included or excluded\*

|                                          | Included<br>(n = 3,215) | Excluded<br>(n = 828) | P      |
|------------------------------------------|-------------------------|-----------------------|--------|
| Age at heart failure hospitalization (y) | 72.7 (7.0)              | 72.8 (7.5)            | 0.77   |
| Race/ethnicity (%)                       |                         |                       | <0.001 |
| American Indian/Alaskan Native           | 0.5                     | 0.5                   |        |
| Asian/Pacific Islander                   | 1.0                     | 1.0                   |        |
| Black                                    | 10.5                    | 17.3                  |        |
| Hispanic                                 | 1.7                     | 4.3                   |        |
| White not of Hispanic origin             | 85.4                    | 75.1                  |        |
| Not one of above                         | 1.0                     | 1.8                   |        |
| Education (%)                            |                         |                       | <0.001 |
| Less than high school                    | 8.2                     | 15.8                  |        |
| High school graduate/some college        | 61.4                    | 60.0                  |        |
| College graduate                         | 8.2                     | 6.9                   |        |
| Graduate school                          | 22.2                    | 17.3                  |        |
| Income (%)                               |                         |                       | <0.001 |
| <\$20,000                                | 31.6                    | 45.1                  |        |
| \$20,000-34,999                          | 30.5                    | 27.3                  |        |
| \$35,000-49,999                          | 17.7                    | 12.2                  |        |
| ≥\$50,000                                | 20.2                    | 15.5                  |        |
| Married (%)                              | 51.6                    | 50.3                  | 0.50   |
| Current cigarette smoking (%)            | 8.9                     | 10.1                  | 0.25   |
| Body mass index (kg/m <sup>2</sup> )     | 30.5 (7.4)              | 30.3 (7.1)            | 0.73   |
| Physical activity (MET-hr/wk)            | 8.8 (11.3)              | 9.5 (12.1)            | 0.07   |
| Rand-36 Physical function score          | 59.5 (26.7)             | 56.4 (27.4)           | 0.002  |
| Systolic blood pressure (mm Hg)          | 134 (20)                | 136 (22)              | 0.40   |
| Diastolic blood pressure (mm Hg)         | 72 (11)                 | 73 (12)               | 0.004  |
| History of high cholesterol (%)          | 22.5                    | 19.1                  | 0.03   |
| History of hypertension (%)              | 58.4                    | 55.3                  | 0.10   |
| History of diabetes (%)                  | 27.9                    | 30.8                  | 0.10   |
| History of myocardial infarction (%)     | 17.6                    | 18.4                  | 0.63   |
| History of revascularization (%)         | 17.2                    | 16.2                  | 0.49   |
| History of atrial fibrillation (%)       | 14.7                    | 15.2                  | 0.70   |
| Off-study postmenopausal hormone use (%) | 26.0                    | 20.2                  | <0.001 |
| Use of diuretics (%)                     | 41.8                    | 37.6                  | 0.03   |
| Use of β-blockers (%)                    | 23.4                    | 22.6                  | 0.62   |
| Use of ACE inhibitor or ARB (%)          | 32.0                    | 31.0                  | 0.59   |
| WHI hormone arm (%)                      |                         |                       | 0.10   |
| Estrogen alone intervention              | 5.1                     | 5.2                   |        |
| Estrogen alone control                   | 5.2                     | 5.6                   |        |
| Estrogen plus progestin intervention     | 4.6                     | 3.6                   |        |
| Estrogen plus progestin control          | 4.7                     | 6.9                   |        |
| WHI diet modification arm (%)            |                         |                       | 0.45   |
| Diet modification intervention           | 11.8                    | 11.5                  |        |
| Diet modification control                | 17.5                    | 15.8                  |        |
| WHI calcium/vitamin D arm (%)            |                         |                       | 0.67   |
| Calcium/vitamin D intervention           | 10.4                    | 9.3                   |        |
| Calcium/vitamin D control                | 10.4                    | 10.4                  |        |

\*Numbers are mean (standard deviation) or percent. For excluded participants, many of whom were excluded for missing data, numbers are calculated for those with available data.

Supplemental Table 2. Causes of death among Women’s Health Initiative participants with heart failure

| Cause of death         | Frequency | Percent <sup>*</sup> |
|------------------------|-----------|----------------------|
| Breast cancer          | 23        | 1.66                 |
| Ovarian cancer         | 8         | 0.58                 |
| Endometrial cancer     | 3         | 0.22                 |
| Colon cancer           | 19        | 1.37                 |
| Rectosigmoid cancer    | 1         | 0.07                 |
| Rectum cancer          | 2         | 0.14                 |
| Other cancer           | 143       | 10.32                |
| Unknown cancer site    | 5         | 0.36                 |
| Definite CHD           | 289       | 20.87                |
| Cerebrovascular        | 90        | 6.5                  |
| Pulmonary embolism     | 7         | 0.51                 |
| Possible CHD           | 110       | 7.94                 |
| Other cardiovascular   | 194       | 14.01                |
| Unknown cardiovascular | 11        | 0.79                 |
| Accident               | 26        | 1.88                 |
| Suicide                | 1         | 0.07                 |
| Other injury           | 1         | 0.07                 |
| Other known cause      | 320       | 23.1                 |
| Unknown cause          | 33        | 2.38                 |
| Not adjudicated        | 99        | 7.15                 |

CHD: coronary heart disease

\* Percent of participants who died

Supplemental Table 3. Mediterranean and DASH diet scores and food and nutrient intake

|                                               | Mediterranean diet score |            |            |            |         | DASH diet score |            |            |            |         |
|-----------------------------------------------|--------------------------|------------|------------|------------|---------|-----------------|------------|------------|------------|---------|
|                                               | Quartile 1               | Quartile 2 | Quartile 3 | Quartile 4 | P-trend | Quartile 1      | Quartile 2 | Quartile 3 | Quartile 4 | P-trend |
| <i>Food intake*</i>                           |                          |            |            |            |         |                 |            |            |            |         |
| Fruit, cup/d <sup>†, ‡</sup>                  | 0.9                      | 1.5        | 1.9        | 2.4        | <0.001  | 0.8             | 1.3        | 1.8        | 2.5        | <0.001  |
| Vegetables, cup/d <sup>†, ‡</sup>             | 0.6                      | 1.0        | 1.3        | 1.6        | <0.001  | 0.7             | 0.9        | 1.2        | 1.6        | <0.001  |
| Nuts, oz/d <sup>†, ‡</sup>                    | 0.2                      | 0.3        | 0.4        | 0.6        | <0.001  | 0.2             | 0.3        | 0.4        | 0.6        | <0.001  |
| Legumes, oz/d <sup>†, ‡</sup>                 | 0.1                      | 0.3        | 0.4        | 0.6        | <0.001  | 0.2             | 0.3        | 0.4        | 0.6        | <0.001  |
| Whole grains, oz/d <sup>†, ‡</sup>            | 0.6                      | 1.0        | 1.3        | 1.6        | <0.001  | 0.6             | 0.9        | 1.2        | 1.7        | <0.001  |
| Low-fat dairy, servings/d <sup>‡</sup>        | 0.9                      | 1.0        | 1.2        | 1.4        | <0.001  | 0.5             | 0.8        | 1.2        | 1.9        | <0.001  |
| Fish, oz/d <sup>†</sup>                       | 0.3                      | 0.5        | 0.7        | 0.9        | <0.001  | 0.5             | 0.5        | 0.6        | 0.7        | <0.001  |
| Red and processed meats, oz/d <sup>†, ‡</sup> | 2.2                      | 2.1        | 2.1        | 1.9        | 0.002   | 2.5             | 2.2        | 2.0        | 1.6        | <0.001  |
| Sweetened beverages, servings/d <sup>‡</sup>  | 0.3                      | 0.2        | 0.2        | 0.2        | 0.001   | 0.4             | 0.2        | 0.2        | 0.1        | <0.001  |
| <i>Nutrient intake*</i>                       |                          |            |            |            |         |                 |            |            |            |         |
| Total energy intake, kcal/d <sup>§</sup>      | 2,138                    | 2,153      | 2,174      | 2,146      | 0.45    | 2,171           | 2,161      | 2,155      | 2,124      | <0.001  |
| Saturated fat, g/d <sup>†,   </sup>           | 23.6                     | 20.0       | 17.6       | 15.7       | <0.001  | 22.7            | 20.5       | 18.4       | 15.6       | <0.001  |
| Monounsaturated fat, g/d <sup>†,   </sup>     | 24.1                     | 22.6       | 20.8       | 19.3       | <0.001  | 25.8            | 23.0       | 20.7       | 17.9       | <0.001  |
| Polyunsaturated fat, g/d <sup>  </sup>        | 11.9                     | 12.0       | 11.7       | 11.3       | <0.001  | 13.2            | 12.3       | 11.4       | 10.4       | <0.001  |
| Protein, g/d <sup>  </sup>                    | 65.5                     | 66.3       | 67.4       | 67.2       | 0.008   | 66.0            | 65.7       | 66.7       | 67.7       | 0.004   |
| Carbohydrate, g/d <sup>  </sup>               | 175                      | 189        | 199        | 210        | <0.001  | 170             | 184        | 199        | 217        | <0.001  |
| Sodium, mg/d <sup>†,   </sup>                 | 2,516                    | 2,632      | 2,725      | 2,941      | <0.001  | 2,717           | 2,653      | 2,636      | 2,612      | <0.001  |
| Potassium, mg/d <sup>  </sup>                 | 2,240                    | 2,517      | 2,738      | 2,941      | <0.001  | 2,084           | 2,442      | 2,726      | 3,120      | <0.001  |
| Calcium, mg/d <sup>  </sup>                   | 800                      | 795        | 813        | 830        | 0.03    | 629             | 756        | 853        | 973        | <0.001  |
| Magnesium, mg/d <sup>  </sup>                 | 209                      | 239        | 261        | 283        | <0.001  | 199             | 234        | 259        | 296        | <0.001  |
| Fiber, g/d <sup>  </sup>                      | 11.2                     | 14.7       | 17.3       | 19.7       | <0.001  | 11.4            | 14.2       | 16.6       | 20.2       | <0.001  |
| Alcohol, g/d <sup>†</sup>                     | 3.6                      | 3.1        | 4.0        | 4.2        | 0.05    | 3.0             | 3.9        | 3.7        | 3.8        | 0.13    |

\*Values presented are means.

†Component of Mediterranean diet score

‡Component of DASH diet score

§ Energy calibrated to doubly labeled water

|| Adjusted for energy using the residuals method

Supplemental Table 4. Hazard ratios\* (95% confidence intervals) for the association of Mediterranean and DASH diet scores and mortality among women with heart failure: sensitivity analyses in subgroups of participants with heart failure

|                                                               | Quartile 1 | Quartile 2       | Quartile 3       | Quartile 4       | p-trend |
|---------------------------------------------------------------|------------|------------------|------------------|------------------|---------|
| <i>Mediterranean diet score</i>                               |            |                  |                  |                  |         |
| No self-reported heart failure at baseline                    | 1          | 1.10 (0.94-1.29) | 1.02 (0.84-1.23) | 0.87 (0.72-1.06) | 0.17    |
| No history of cancer                                          | 1          | 1.08 (0.91-1.28) | 1.02 (0.83-1.25) | 0.90 (0.73-1.10) | 0.31    |
| Physician diagnosis of heart failure at index hospitalization | 1          | 1.03 (0.89-1.21) | 0.93 (0.78-1.13) | 0.83 (0.69-1.00) | 0.04    |
| Not in diet modification or calcium/vitamin D trials          | 1          | 1.05 (0.87-1.26) | 0.96 (0.77-1.21) | 0.85 (0.68-1.05) | 0.10    |
| <i>DASH diet score</i>                                        |            |                  |                  |                  |         |
| No self-reported heart failure at baseline                    | 1          | 1.05 (0.89-1.24) | 0.86 (0.74-1.02) | 0.83 (0.69-0.99) | 0.01    |
| No history of cancer                                          | 1          | 1.07 (0.89-1.27) | 0.83 (0.70-0.99) | 0.85 (0.70-1.02) | 0.02    |
| Physician diagnosis of heart failure at index hospitalization | 1          | 1.01 (0.86-1.18) | 0.79 (0.67-0.92) | 0.82 (0.69-0.97) | 0.004   |
| Not in diet modification or calcium/vitamin D trials          | 1          | 1.08 (0.89-1.31) | 0.88 (0.73-1.06) | 0.89 (0.73-1.09) | 0.11    |

\* Adjusted for age at heart failure hospitalization, total energy intake, race/ethnicity, education, income, married, current smoking, total exercise, physical function, use of off-study postmenopausal hormone therapy, WHI study arm systolic blood pressure, diastolic blood pressure, use of diuretics, beta-blockers, and angiotensin converting enzyme inhibitors or angiotensin receptor blockers, body mass index, and history of high cholesterol, high blood pressure, diabetes, myocardial infarction, coronary revascularization, and atrial fibrillation.

Supplemental Table 5. Mediterranean and DASH diet scores and cardiovascular disease mortality among women with heart failure

|                                 | Quartile 1 | Quartile 2       | Quartile 3       | Quartile 4       | p-trend |
|---------------------------------|------------|------------------|------------------|------------------|---------|
| <i>Mediterranean diet score</i> |            |                  |                  |                  |         |
| N                               | 572        | 1,305            | 589              | 749              |         |
| Median (Range)                  | 2 (0-2)    | 4 (3-4)          | 5 (5-5)          | 6 (6-9)          |         |
| Cardiovascular deaths           | 117        | 309              | 126              | 142              |         |
| Person-years                    | 2,582      | 5,772            | 2,741            | 3,639            |         |
| Model 1 HR (95% CI)*            | 1          | 1.17 (0.94-1.47) | 1.00 (0.77-1.30) | 0.82 (0.64-1.05) | 0.05    |
| Model 2 HR (95% CI)†            | 1          | 1.24 (0.99-1.56) | 1.13 (0.86-1.49) | 0.95 (0.74-1.23) | 0.67    |
| Model 3 HR (95% CI)‡            | 1          | 1.20 (0.95-1.52) | 1.09 (0.82-1.43) | 0.88 (0.68-1.15) | 0.33    |
| <i>DASH diet score</i>          |            |                  |                  |                  |         |
| N                               | 768        | 704              | 956              | 787              |         |
| Median (Range)                  | 19 (9-21)  | 23 (22-24)       | 26 (25-28)       | 31 (29-40)       |         |
| Cardiovascular deaths           | 179        | 152              | 191              | 172              |         |
| Person-years                    | 3,440      | 3,120            | 4,477            | 3,698            |         |
| Model 1 HR (95% CI)*            | 1          | 0.88 (0.70-1.10) | 0.73 (0.59-0.92) | 0.76 (0.61-0.95) | 0.009   |
| Model 2 HR (95% CI)†            | 1          | 0.92 (0.74-1.16) | 0.80 (0.63-1.02) | 0.87 (0.69-1.10) | 0.20    |
| Model 3 HR (95% CI)‡            | 1          | 0.90 (0.71-1.13) | 0.76 (0.60-0.97) | 0.82 (0.65-1.05) | 0.09    |

\* Adjusted for age at heart failure hospitalization and total energy intake

† Adjusted for variables in Model 1 and race/ethnicity, education, income, married, current smoking, total exercise, physical function, use of off-study postmenopausal hormone therapy, and WHI study arm

‡ Adjusted for variables in Model 2 and systolic blood pressure, diastolic blood pressure, use of diuretics, beta-blockers, and angiotensin converting enzyme inhibitors or angiotensin receptor blockers, body mass index, and history of high cholesterol, high blood pressure, diabetes, myocardial infarction, coronary revascularization, and atrial fibrillation.

Supplemental Table 6. Mediterranean and DASH diet scores and mortality among selected subgroups of women with heart failure

|                                           | Quartile 1 | Quartile 2       | Quartile 3       | Quartile 4       | p-trend | p-interaction |
|-------------------------------------------|------------|------------------|------------------|------------------|---------|---------------|
| <i>Mediterranean diet score</i>           |            |                  |                  |                  |         |               |
| Body mass index <25 kg/m <sup>2</sup>     |            |                  |                  |                  |         | 0.60          |
| Deaths                                    | 69         | 145              | 60               | 100              |         |               |
| Person-years                              | 531        | 1,143            | 618              | 1,027            |         |               |
| HR (95% CI) *                             | 1          | 1.21 (0.89-1.65) | 1.06 (0.73-1.53) | 0.88 (0.62-1.23) | 0.31    |               |
| Body mass index 25-29.9 kg/m <sup>2</sup> |            |                  |                  |                  |         |               |
| Deaths                                    | 75         | 170              | 68               | 82               |         |               |
| Person-years                              | 683        | 1,636            | 841              | 1,174            |         |               |
| HR (95% CI) *                             | 1          | 0.96 (0.72-1.28) | 0.81 (0.57-1.15) | 0.73 (0.51-1.03) | 0.05    |               |
| Body mass index 30-34.9 kg/m <sup>2</sup> |            |                  |                  |                  |         |               |
| Deaths                                    | 61         | 129              | 58               | 57               |         |               |
| Person-years                              | 709        | 1,277            | 683              | 695              |         |               |
| HR (95% CI) *                             | 1          | 1.25 (0.91-1.73) | 1.07 (0.72-1.57) | 1.02 (0.68-1.53) | 0.94    |               |
| Body mass index ≥35 kg/m <sup>2</sup>     |            |                  |                  |                  |         |               |
| Deaths                                    | 55         | 143              | 62               | 51               |         |               |
| Person-years                              | 659        | 1,717            | 600              | 743              |         |               |
| HR (95% CI) *                             | 1          | 0.93 (0.67-1.28) | 1.02 (0.70-1.50) | 0.76 (0.51-1.15) | 0.33    |               |
| History of diabetes                       |            |                  |                  |                  |         | 0.78          |
| Deaths                                    | 87         | 180              | 83               | 91               |         |               |
| Person-years                              | 624        | 1,512            | 698              | 808              |         |               |
| HR (95% CI) *                             | 1          | 0.85 (0.65-1.12) | 0.90 (0.66-1.24) | 0.83 (0.60-1.14) | 0.30    |               |
| No history of diabetes                    |            |                  |                  |                  |         |               |
| Deaths                                    | 173        | 407              | 165              | 199              |         |               |
| Person-years                              | 1,958      | 4,260            | 2,043            | 2,831            |         |               |
| HR (95% CI) *                             | 1          | 1.18 (0.99-1.42) | 1.04 (0.83-1.30) | 0.88 (0.70-1.09) | 0.20    |               |



Supplemental Table 6 cont. Mediterranean and DASH diet scores and mortality among selected subgroups of women with heart failure

|                                                          | Quartile 1 | Quartile 2       | Quartile 3       | Quartile 4       | p-trend | p-interaction |
|----------------------------------------------------------|------------|------------------|------------------|------------------|---------|---------------|
| <i>Mediterranean diet score</i>                          |            |                  |                  |                  |         |               |
| History of myocardial infarction or revascularization    |            |                  |                  |                  |         | 0.52          |
| Deaths                                                   | 82         | 169              | 63               | 92               |         |               |
| Person-years                                             | 720        | 1,289            | 563              | 886              |         |               |
| HR (95% CI) *                                            | 1          | 1.08 (0.81-1.42) | 1.01 (0.72-1.43) | 0.92 (0.66-1.28) | 0.60    |               |
| No history of myocardial infarction or revascularization |            |                  |                  |                  |         |               |
| Deaths                                                   | 178        | 418              | 185              | 198              |         |               |
| Person-years                                             | 1,862      | 4,483            | 2,178            | 2,753            |         |               |
| HR (95% CI) *                                            | 1          | 1.03 (0.86-1.23) | 0.98 (0.79-1.21) | 0.82 (0.66-1.02) | 0.08    |               |
| Income <\$20,000/year                                    |            |                  |                  |                  |         | 0.89          |
| Deaths                                                   | 108        | 240              | 82               | 68               |         |               |
| Person-years                                             | 907        | 1,897            | 774              | 727              |         |               |
| HR (95% CI) *                                            | 1          | 1.10 (0.87-1.40) | 0.92 (0.68-1.25) | 0.80 (0.58-1.11) | 0.21    |               |
| Income ≥\$20,000/year                                    |            |                  |                  |                  |         |               |
| Deaths                                                   | 152        | 347              | 166              | 222              |         |               |
| Person-years                                             | 1,675      | 3,875            | 1,967            | 2,912            |         |               |
| HR (95% CI) *                                            | 1          | 1.00 (0.82-1.21) | 0.97 (0.77-1.22) | 0.83 (0.67-1.04) | 0.10    |               |
| Current cigarette smoking                                |            |                  |                  |                  |         | 0.81          |
| Deaths                                                   | 47         | 68               | 17               | 20               |         |               |
| Person-years                                             | 344        | 576              | 146              | 197              |         |               |
| HR (95% CI) *                                            | 1          | 0.92 (0.58-1.47) | 0.70 (0.37-1.35) | 0.90 (0.48-1.66) | 0.49    |               |
| No current cigarette smoking                             |            |                  |                  |                  |         |               |
| Deaths                                                   | 213        | 519              | 231              | 270              |         |               |
| Person-years                                             | 2,238      | 5,196            | 2,595            | 3,442            |         |               |
| HR (95% CI) *                                            | 1          | 1.05 (0.89-1.24) | 1.01 (0.83-1.22) | 0.84 (0.70-1.02) | 0.08    |               |

Supplemental Table 6 cont. Mediterranean and DASH diet scores and mortality among selected subgroups of women with heart failure

|                                           | Quartile 1 | Quartile 2       | Quartile 3       | Quartile 4       | p-trend | p-interaction |
|-------------------------------------------|------------|------------------|------------------|------------------|---------|---------------|
| <i>DASH diet score</i>                    |            |                  |                  |                  |         |               |
| Body mass index <25 kg/m <sup>2</sup>     |            |                  |                  |                  |         | 0.57          |
| Deaths                                    | 71         | 73               | 111              | 119              |         |               |
| Person-years                              | 607        | 535              | 958              | 1,217            |         |               |
| HR (95% CI) *                             | 1          | 1.09 (0.77-1.54) | 1.02 (0.74-1.41) | 0.86 (0.62-1.21) | 0.24    |               |
| Body mass index 25-29.9 kg/m <sup>2</sup> |            |                  |                  |                  |         |               |
| Deaths                                    | 98         | 98               | 107              | 92               |         |               |
| Person-years                              | 811        | 924              | 1,447            | 1,153            |         |               |
| HR (95% CI) *                             | 1          | 0.89 (0.67-1.19) | 0.60 (0.44-0.80) | 0.72 (0.52-0.99) | 0.01    |               |
| Body mass index 30-34.9 kg/m <sup>2</sup> |            |                  |                  |                  |         |               |
| Deaths                                    | 84         | 81               | 81               | 59               |         |               |
| Person-years                              | 899        | 800              | 986              | 679              |         |               |
| HR (95% CI) *                             | 1          | 1.23 (0.89-1.69) | 0.92 (0.65-1.28) | 0.84 (0.58-1.21) | 0.23    |               |
| Body mass index ≥35 kg/m <sup>2</sup>     |            |                  |                  |                  |         |               |
| Deaths                                    | 92         | 77               | 87               | 55               |         |               |
| Person-years                              | 1,123      | 861              | 1,085            | 649              |         |               |
| HR (95% CI) *                             | 1          | 1.00 (0.73-1.38) | 0.89 (0.65-1.22) | 0.90 (0.63-1.30) | 0.47    |               |
| History of diabetes                       |            |                  |                  |                  |         | 0.11          |
| Deaths                                    | 114        | 107              | 118              | 102              |         |               |
| Person-years                              | 985        | 823              | 1,089            | 743              |         |               |
| HR (95% CI) *                             | 1          | 1.00 (0.76-1.33) | 0.80 (0.61-1.06) | 1.03 (0.76-1.40) | 0.88    |               |
| No history of diabetes                    |            |                  |                  |                  |         |               |
| Deaths                                    | 231        | 222              | 268              | 223              |         |               |
| Person-years                              | 2,455      | 2,296            | 3,387            | 2,954            |         |               |
| HR (95% CI) *                             | 1          | 1.04 (0.86-1.26) | 0.85 (0.70-1.02) | 0.76 (0.62-0.93) | 0.002   |               |

Supplemental Table 6 cont. Mediterranean and DASH diet scores and mortality among selected subgroups of women with heart failure

|                                                          | Quartile 1 | Quartile 2       | Quartile 3       | Quartile 4       | p-trend | p-interaction |
|----------------------------------------------------------|------------|------------------|------------------|------------------|---------|---------------|
| <i>DASH diet score</i>                                   |            |                  |                  |                  |         |               |
| History of myocardial infarction or revascularization    |            |                  |                  |                  |         | 0.89          |
| Deaths                                                   | 107        | 92               | 117              | 90               |         |               |
| Person-years                                             | 899        | 665              | 1,088            | 805              |         |               |
| HR (95% CI) *                                            | 1          | 1.00 (0.74-1.34) | 0.80 (0.61-1.06) | 0.86 (0.64-1.17) | 0.23    |               |
| No history of myocardial infarction or revascularization |            |                  |                  |                  |         |               |
| Deaths                                                   | 238        | 237              | 269              | 235              |         |               |
| Person-years                                             | 2,541      | 2,455            | 3,388            | 2,892            |         |               |
| HR (95% CI) *                                            | 1          | 1.05 (0.88-1.27) | 0.85 (0.71-1.02) | 0.84 (0.69-1.03) | 0.03    |               |
| Income <\$20,000/year                                    |            |                  |                  |                  |         | 0.17          |
| Deaths                                                   | 152        | 122              | 126              | 98               |         |               |
| Person-years                                             | 1,406      | 910              | 1,180            | 808              |         |               |
| HR (95% CI) *                                            | 1          | 1.18 (0.92-1.51) | 0.92 (0.72-1.18) | 1.06 (0.80-1.40) | 0.99    |               |
| Income ≥\$20,000/year                                    |            |                  |                  |                  |         |               |
| Deaths                                                   | 193        | 207              | 260              | 227              |         |               |
| Person-years                                             | 2,034      | 2,210            | 3,296            | 2,890            |         |               |
| HR (95% CI) *                                            | 1          | 0.93 (0.76-1.14) | 0.76 (0.62-0.92) | 0.72 (0.59-0.90) | 0.001   |               |
| Current cigarette smoking                                |            |                  |                  |                  |         | 0.87          |
| Deaths                                                   | 68         | 36               | 29               | 19               |         |               |
| Person-years                                             | 491        | 340              | 251              | 180              |         |               |
| HR (95% CI) *                                            | 1          | 0.73 (0.46-1.18) | 0.76 (0.47-1.25) | 0.73 (0.39-1.35) | 0.23    |               |
| No current cigarette smoking                             |            |                  |                  |                  |         |               |
| Deaths                                                   | 277        | 293              | 357              | 306              |         |               |
| Person-years                                             | 2,949      | 2,780            | 4,225            | 3,517            |         |               |
| HR (95% CI) *                                            | 1          | 1.08 (0.91-1.28) | 0.85 (0.72-1.00) | 0.85 (0.72-1.02) | 0.02    |               |

\* HR: hazard ratio, CI: confidence interval. Adjusted for age at heart failure hospitalization, total energy intake, race/ethnicity, education, income, married, current smoking, total exercise, physical function, use of off-study postmenopausal hormone therapy, WHI study arm systolic blood pressure, diastolic blood pressure, use of diuretics, beta-blockers, and angiotensin converting enzyme inhibitors or angiotensin receptor blockers, body mass index, and history of high cholesterol, high blood pressure, diabetes, myocardial infarction, coronary revascularization, and atrial fibrillation. All p values for interaction across strata were > 0.05.

## Supplemental Figure 1. Selection of the study population

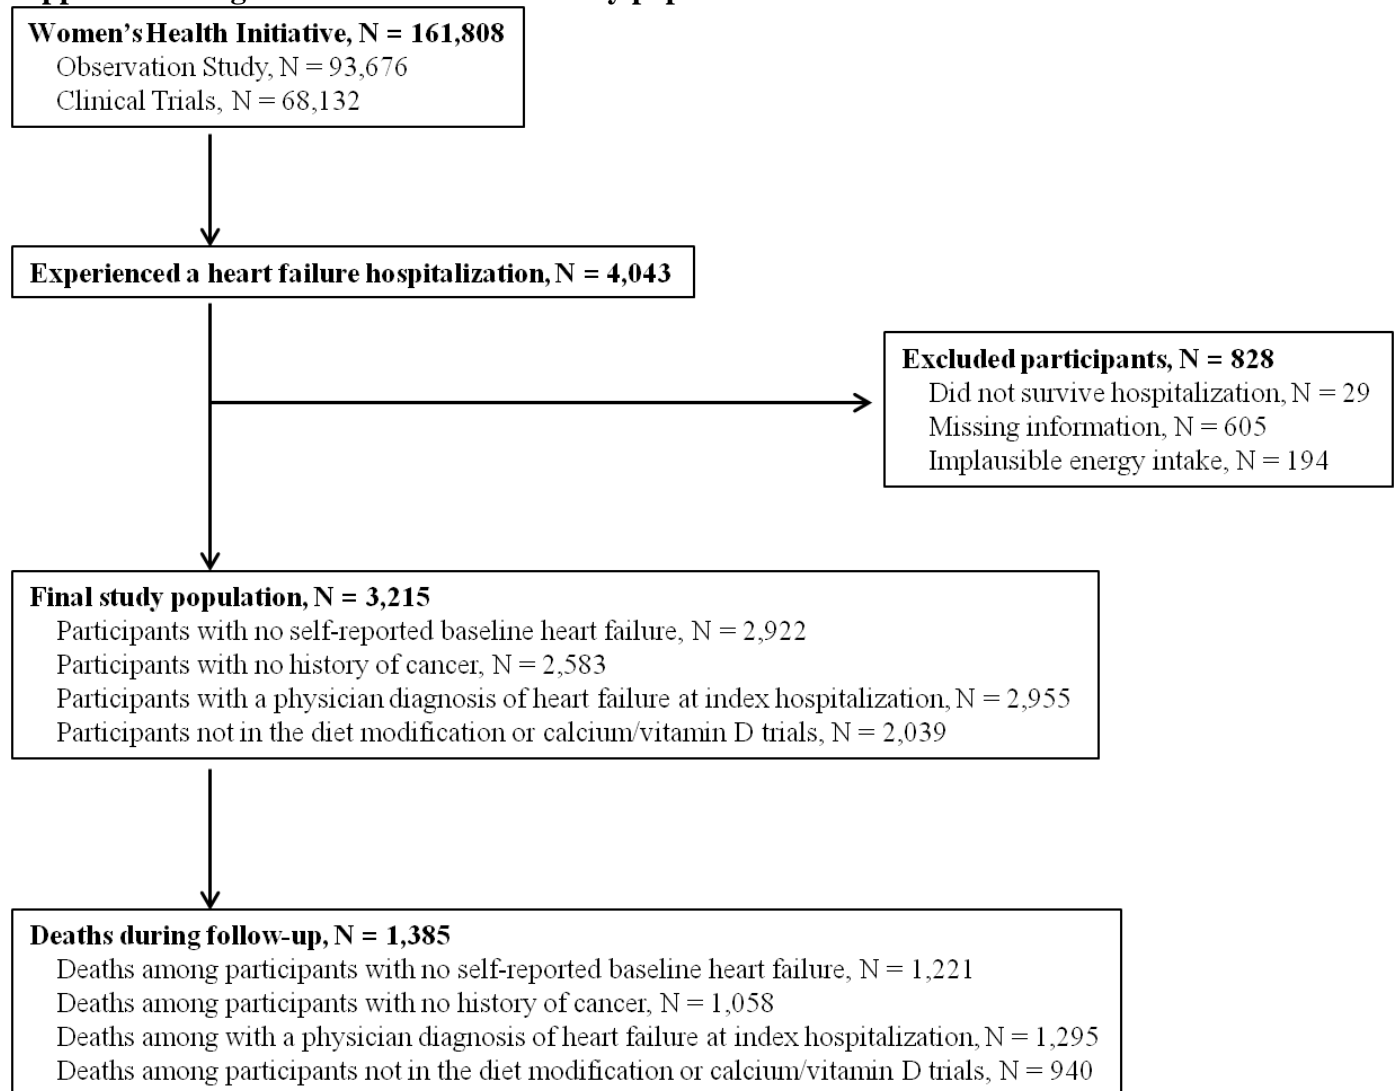

## Supplemental References

1. Patterson RE, Kristal AR, Tinker LF, Carter RA, Bolton MP, Agurs-Collins T. Measurement characteristics of the Women's Health Initiative food frequency questionnaire. *Ann Epidemiol.* 1999; 9:178-187.
2. Willett WC. *Nutritional epidemiology.* New York: Oxford University Press; 1998.
3. Neuhauser ML, Tinker L, Shaw PA, Schoeller D, Bingham SA, Horn LV, Beresford SA, Caan B, Thomson C, Satterfield S, Kuller L, Heiss G, Smit E, Sarto G, Ockene J, Stefanick ML, Assaf A, Runswick S, Prentice RL. Use of recovery biomarkers to calibrate nutrient consumption self-reports in the Women's Health Initiative. *Am J Epidemiol.* 2008; 167:1247-1259.
4. Bowman SA, Friday JE, Moshfegh A. MyPyramid Equivalents Database, 2.0 for USDA Survey Foods, 2003-2004: Documentation and User Guide [Online] Food Surveys Research Group. 2008. Beltsville Human Nutrition Research Center, Agricultural Research Service, U.S. Department of Agriculture, Beltsville, MD. Available at: <http://www.ars.usda.gov/ba/bhnrc/fsrg>.
5. Fung TT, Rexrode KM, Mantzoros CS, Manson JE, Willett WC, Hu FB. Mediterranean diet and incidence of and mortality from coronary heart disease and stroke in women. *Circulation.* 2009; 119:1093-1100.
6. Fung TT, Chiuve SE, McCullough ML, Rexrode KM, Logroscino G, Hu FB. Adherence to a DASH-style diet and risk of coronary heart disease and stroke in women. *Arch Intern Med.* 2008; 168:713-720.
